# Supplementary material
Source: MDPI journal article supplement (https://www.mdpi.com/2076-3298/10/8/146)
Supplement: s1 [file s1]

**Table S1:** Mean values ( $\pm$  st.dv.) of pH, water (WC), carbon (C), nitrogen (N), and organic matter contents (expressed as % d.w.) and C/N ratio of the soils collected at forest (F), burned forest (WF), and urban (U) areas.

| site         | pH          | WC           | C           | N           | C/N          | OM          | site      | pH          | WC          | C           | N           | C/N         | OM          | site     | pH          | WC           | C           | N           | C/N          | OM           |
|--------------|-------------|--------------|-------------|-------------|--------------|-------------|-----------|-------------|-------------|-------------|-------------|-------------|-------------|----------|-------------|--------------|-------------|-------------|--------------|--------------|
| <b>F</b>     | 7.75        | 18.01        | 9.58        | 0.52        | 18.42        | 15.44       | <b>WF</b> | 7.18        | 6.66        | 0.35        | 0.24        | 1.46        | 5.19        | <b>U</b> | 7.82        | 19.63        | 4.49        | 0.42        | 10.69        | 7.72         |
|              | 7.83        | 17.93        | 8.83        | 0.47        | 18.63        | 14.75       |           | 7.27        | 6.46        | 0.31        | 0.18        | 1.76        | 7.19        |          |             | 19.76        | 5.58        | 0.43        | 12.98        | 9.60         |
|              |             |              | 9.21        | 0.46        | 20.19        | 16.28       |           |             | 6.54        | 0.43        | 0.20        | 2.17        | 6.17        |          |             | 19.21        | 4.91        | 0.40        | 12.28        | 8.45         |
| <b>F</b>     | 7.25        | 0.93         | 6.45        | 0.44        | 14.73        | 4.15        | <b>WF</b> | 7.93        | 5.97        | 3.61        | 0.21        | 16.86       | 4.56        | <b>U</b> | 7.65        | 16.56        | 4.09        | 0.31        | 13.19        | 7.03         |
|              | 7.30        | 1.13         | 4.97        | 0.38        | 13.25        | 4.00        |           | 7.90        | 5.53        | 4.56        | 0.24        | 18.93       | 8.49        |          |             | 16.51        | 3.64        | 0.36        | 10.11        | 6.26         |
|              |             | 0.88         | 4.84        | 0.36        | 13.55        | 3.89        |           |             | 5.44        | 3.38        | 0.21        | 16.33       | 6.15        |          |             | 15.91        | 3.69        | 0.36        | 10.25        | 6.35         |
| <b>F</b>     | 6.68        | 52.67        | 19.57       | 1.29        | 15.22        | 23.69       | <b>WF</b> | 7.94        | 3.14        | 1.52        | 0.22        | 6.90        | 8.79        | <b>U</b> | 7.92        | 6.23         | 2.79        | 0.21        | 13.29        | 4.80         |
|              | 6.69        | 62.60        | 19.03       | 1.00        | 19.04        | 22.08       |           | 7.92        | 3.09        | 1.51        | 0.23        | 6.61        | 10.02       |          |             | 6.08         | 2.91        | 0.21        | 13.86        | 5.01         |
|              |             | 51.21        | 19.50       | 1.05        | 18.65        | 19.79       |           |             | 4.16        | 1.52        | 0.20        | 7.73        | 7.86        |          |             | 6.23         | 2.95        | 0.26        | 11.35        | 5.07         |
| <b>F</b>     | 8.00        | 24.71        | 3.02        | 0.13        |              | 3.02        | <b>WF</b> | 7.23        | 1.90        | 13.49       | 0.73        | 18.40       | 16.60       | <b>U</b> | 8.04        | 13.46        | 6.43        | 0.54        | 11.91        | 11.06        |
|              | 8.08        | 24.00        | 3.24        | 0.26        | 12.25        | 2.54        |           | 7.29        |             | 13.26       | 0.67        | 19.86       | 17.99       |          |             | 14.26        | 6.41        | 0.52        | 12.33        | 11.03        |
|              |             | 24.47        | 3.26        | 0.25        | 12.88        | 3.75        |           |             |             | 12.91       | 0.70        | 18.36       | 18.86       |          |             |              | 6.68        | 0.59        | 11.32        | 11.49        |
| <b>F</b>     | 7.04        | 5.26         | 2.38        | 0.22        | 10.68        | 2.76        | <b>WF</b> | 6.71        |             | 10.38       | 1.10        | 9.43        | 9.54        | <b>U</b> | 7.98        |              | 9.23        | 0.41        | 22.51        | 15.88        |
|              | 7.06        | 5.15         | 2.39        | 0.21        | 11.12        | 3.54        |           | 6.71        | 7.78        | 9.68        | 1.01        | 9.57        | 12.58       |          |             | 6.43         | 8.97        | 0.34        | 26.38        | 15.43        |
|              |             | 6.00         | 2.30        | 0.21        | 11.12        | 3.23        |           |             | 7.73        | 9.28        | 0.96        | 9.63        |             |          |             | 2.88         | 10.00       | 0.38        | 26.32        | 17.20        |
| <b>F</b>     | 7.75        | 6.90         | 3.02        | 0.22        | 13.92        | 3.40        | <b>WF</b> | 7.21        | 3.66        | 5.26        | 3.00        | 1.75        | 5.46        | <b>U</b> | 6.56        | 8.80         | 7.42        | 0.23        |              | 12.76        |
|              | 7.70        | 6.67         | 3.24        | 0.26        | 12.25        | 4.45        |           | 7.23        | 3.27        | 6.14        | 3.06        | 2.01        | 5.51        |          |             | 9.48         | 7.83        | 0.30        | 26.10        | 13.47        |
|              |             | 6.50         | 3.26        | 0.25        | 12.88        | 3.72        |           |             | 3.41        | 6.50        | 3.31        | 1.96        | 7.10        |          |             | 8.76         | 7.50        | 0.39        | 19.23        | 12.90        |
| <b>mean</b>  | <b>7.43</b> | <b>18.53</b> | <b>7.12</b> | <b>0.44</b> | <b>14.64</b> | <b>8.58</b> |           | <b>7.38</b> | <b>4.98</b> | <b>5.78</b> | <b>0.92</b> | <b>9.43</b> | <b>9.30</b> |          | <b>7.66</b> | <b>11.89</b> | <b>5.86</b> | <b>0.37</b> | <b>15.53</b> | <b>10.08</b> |
| <b>st.dv</b> | <b>0.47</b> | <b>19.00</b> | <b>5.94</b> | <b>0.32</b> | <b>3.05</b>  | <b>7.41</b> |           | <b>0.43</b> | <b>1.80</b> | <b>4.54</b> | <b>1.04</b> | <b>6.77</b> | <b>4.42</b> |          | <b>0.51</b> | <b>5.46</b>  | <b>2.24</b> | <b>0.11</b> | <b>5.83</b>  | <b>3.86</b>  |
